# Supplementary material for: Oxalotrophic bacteria in the ectomycorrhizosphere play an essential role in phosphorus mobilization
Source: Research Square preprint supplement (doi:10.21203/rs.3.rs-6938665/v1), 2025-08-13
Supplement: Supplementary file 1 [file dcab0d0a301232d46317e297.xlsx]

## Sheet: Table S1
Species	NCBI RefSeq assembly	frc	aphA	appA	gcd	phoA	phoD	phoN	phoC	ppa	ppx	phy	phoX	glpQ	ugpQ	InorgP（gcd+ppa）	ACP(aphA+phoN+phoC)	ALP(phoA+phoD+phoX)	Phytase(appA+phy)	PolyP(ppx)	GDGPs(glpQ+ugpQ)
Actinacidiphila glaucinigra	GCF_035918135.1	3	0	0	0	1	6	0	1	1	0	0	0	3	2	1	1	7	0	0	5
Actinoplanes sichuanensis	GCF_033097365.1	4	0	0	0	1	2	1	1	1	1	1	0	2	1	1	2	3	1	1	3
Azospirillum oryzae	GCF_013347285.1	4	0	0	1	0	0	0	0	1	0	0	1	1	1	2	0	1	0	0	2
Azospirillum_brasilense	GCF_007827425.1	7	0	0	1	0	0	0	0	1	0	0	0	1	1	2	0	0	0	0	2
Bradyrhizobium barranii subsp. apii	GCF_017565685.3	4	0	0	4	1	0	1	1	1	2	0	0	0	0	5	2	1	0	2	0
Bradyrhizobium barranii subsp. barranii	GCF_011068405.5	3	0	0	4	1	1	1	1	1	1	0	0	0	1	5	2	2	0	1	1
Bradyrhizobium sp. 1(2017)	GCF_011602485.2	5	0	0	3	1	0	0	0	2	1	0	0	0	0	5	0	1	0	1	0
Bradyrhizobium sp. 27S5	GCF_037217225.1	3	0	0	1	0	0	0	1	3	0	0	0	0	0	4	1	0	0	0	0
Bradyrhizobium sp. 2S1	GCF_011516625.5	5	0	0	1	0	0	1	1	3	0	0	0	0	0	4	2	0	0	0	0
Bradyrhizobium sp. 41S5	GCF_011516665.3	2	0	0	2	0	0	1	1	1	0	0	0	0	0	3	2	0	0	0	0
Bradyrhizobium sp. 62B	GCF_030272265.1	4	0	0	1	0	1	0	0	1	1	0	0	0	1	2	0	1	0	1	1
Bradyrhizobium sp. Ash2021	GCF_031202265.1	4	0	0	3	0	0	0	0	2	1	0	0	0	0	5	0	0	0	1	0
Bradyrhizobium sp. C-145	GCF_023375135.1	7	0	0	3	0	1	0	0	2	1	0	0	0	1	5	0	1	0	1	1
Bradyrhizobium sp. CW1	GCF_023100665.1	5	0	0	3	0	0	0	0	2	1	0	0	0	0	5	0	0	0	1	0
Bradyrhizobium sp. I71	GCF_022354745.1	6	0	0	2	1	0	0	0	1	1	0	0	0	0	3	0	1	0	1	0
Bradyrhizobium sp. KBS0725	GCF_005937905.2	5	0	0	3	0	0	0	0	1	1	0	0	0	0	4	0	0	0	1	0
Bradyrhizobium sp. KBS0727	GCF_005937885.2	5	0	0	3	0	0	0	0	1	1	0	0	0	0	4	0	0	0	1	0
Bradyrhizobium sp. NL2	GCF_038729565.1	2	0	0	3	1	0	2	1	2	1	0	0	0	0	5	3	1	0	1	0
Bradyrhizobium sp. NP1	GCF_030378205.1	2	0	0	0	0	0	1	1	1	0	0	0	0	0	1	2	0	0	0	0
Bradyrhizobium sp. SK17	GCF_002831585.1	4	0	0	3	1	0	1	1	1	0	0	0	0	0	4	2	1	0	0	0
Bradyrhizobium_amphicarpaeae	GCF_002266435.3	3	0	0	2	0	0	0	0	1	1	0	0	0	0	3	0	0	0	1	0
Bradyrhizobium_arachidis	GCF_015291705.1	6	0	0	3	0	0	0	1	2	1	0	0	0	0	5	1	0	0	1	0
Bradyrhizobium_cosmicum	GCF_007290395.2	5	0	0	2	1	0	0	0	1	1	0	0	0	0	3	0	1	0	1	0
Bradyrhizobium_diazoefficiens	GCF_004359355.1	4	0	0	2	0	0	0	0	2	1	0	0	0	0	4	0	0	0	1	0
Bradyrhizobium_elkanii	GCF_012871055.1	2	0	0	2	1	0	0	0	2	0	0	0	0	0	4	0	1	0	0	0
Bradyrhizobium_frederickii	GCF_004570865.1	5	0	0	1	1	0	0	0	1	1	0	0	0	1	2	0	1	0	1	1
Bradyrhizobium_japonicum	GCF_013752735.1	2	0	0	3	1	1	0	2	2	1	0	0	0	0	5	2	2	0	1	0
Bradyrhizobium_niftali	GCF_004571025.1	5	0	0	2	1	1	1	0	1	1	0	0	0	1	3	1	2	0	1	1
Bradyrhizobium_ottawaense	GCF_002278135.3	4	0	0	1	1	0	1	0	1	1	0	0	0	1	2	1	1	0	1	1
Bradyrhizobium_quebecense	GCF_017493175.3	3	0	0	2	0	0	0	0	1	0	0	0	0	0	3	0	0	0	0	0
Bradyrhizobium_sediminis	GCF_018736085.1	2	0	0	0	1	0	0	0	1	1	0	0	0	0	1	0	1	0	1	0
Bradyrhizobium_septentrionale	GCF_011516645.4	3	0	0	1	0	1	0	0	2	0	0	0	0	0	3	0	1	0	0	0
Bradyrhizobium_symbiodeficiens	GCF_011604665.2	3	0	0	2	1	0	0	0	1	1	0	0	0	0	3	0	1	0	1	0
Bradyrhizobium_yuanmingense	GCF_029167075.1	5	0	0	2	1	0	0	0	1	1	0	0	0	0	3	0	1	0	1	0
Caballeronia sp. NK8	GCF_018408855.1	8	0	0	2	0	0	0	0	1	1	0	1	0	2	3	0	1	0	1	2
Chenggangzhangella methanolivorans	GCF_019797865.1	1	0	0	3	2	1	0	0	1	0	0	0	0	0	4	0	3	0	0	0
Cupriavidus campinensis	GCF_023547405.1	7	0	0	0	0	1	1	0	1	1	0	1	1	3	1	1	2	0	1	4
Cupriavidus lacunae	GCF_003353055.1	15	0	0	1	0	0	1	1	1	2	0	1	1	1	2	2	1	0	2	2
Cupriavidus necator	GCF_004798725.1	11	0	0	1	2	1	1	1	1	1	0	1	1	2	2	2	4	0	1	3
Cupriavidus necator N-1	GCF_000219215.1	11	0	0	1	1	1	1	1	1	1	0	1	2	2	2	2	3	0	1	4
Cupriavidus oxalaticus	GCF_016894385.1	12	0	0	0	0	2	1	1	1	1	0	1	1	1	1	2	3	0	1	2
Cupriavidus pauculus	GCF_022879635.1	2	0	0	1	0	0	0	0	1	1	0	1	1	1	2	0	1	0	1	2
Cupriavidus pinatubonensis	GCF_019602855.1	7	0	0	0	0	1	1	1	1	1	0	1	1	1	1	2	2	0	1	2
Cupriavidus plantarum	GCF_013408405.1	3	0	0	0	0	0	1	1	1	1	0	1	1	2	1	2	1	0	1	3
Cupriavidus sp. KK10	GCF_018223725.1	10	0	0	2	1	1	1	1	1	3	0	1	2	2	3	2	3	0	3	4
Cupriavidus sp. MP-37	GCF_020618415.1	7	0	0	0	0	2	1	1	1	1	0	1	1	1	1	2	3	0	1	2
Cupriavidus sp. P-10	GCF_003402535.2	11	0	0	0	0	1	1	1	1	1	0	1	1	1	1	2	2	0	1	2
Cupriavidus sp. WKF15	GCF_029278605.1	5	0	0	0	0	1	0	0	1	1	0	1	1	2	1	0	2	0	1	3
Escherichia coli	GCF_002853715.1	1	1	2	1	1	0	0	0	1	2	0	0	1	1	2	1	1	2	2	2
Glaciimonas sp. PAMC28666	GCF_016917355.1	5	0	0	1	0	0	1	1	1	1	0	0	0	1	2	2	0	0	1	1
Massilia sp. R2A-15	GCF_030704305.1	3	0	0	1	0	1	0	0	1	1	0	1	1	1	2	0	2	0	1	2
Massilia timonae	GCF_001866515.1	3	0	0	1	1	1	1	1	1	2	1	0	1	2	2	2	2	1	2	3
Mesorhizobium escarrei	GCF_935825525.1	1	0	0	0	0	0	0	1	1	0	0	0	0	1	1	1	0	0	0	1
Mesorhizobium ventifaucium	GCF_935822925.1	1	0	0	0	0	0	0	1	1	0	0	0	0	1	1	1	0	0	0	1
Methylobacterium oryzae	GCF_000757795.1	4	0	0	1	0	0	3	4	1	0	0	0	0	0	2	7	0	0	0	0
Methylobacterium radiotolerans	GCF_000019725.1	4	0	0	1	0	0	3	3	1	0	0	0	0	0	2	6	0	0	0	0
Methylocystis echinoides	GCF_040687965.1	1	0	0	1	0	0	0	0	1	0	0	0	0	1	2	0	0	0	0	1
Methylorubrum aminovorans	GCF_022179725.1	2	0	0	1	0	0	1	1	1	0	0	0	0	1	2	2	0	0	0	1
Methylorubrum extorquens	GCF_000083545.1	2	0	0	1	0	0	1	1	1	0	0	0	0	0	2	2	0	0	0	0
Micromonospora sp. HM5-17	GCF_003762835.1	1	0	0	0	0	2	0	0	1	1	0	0	0	1	1	0	2	0	1	1
Mycolicibacterium chlorophenolicum	GCF_001552315.1	4	0	0	0	0	1	0	0	1	1	0	0	0	1	1	0	1	0	1	1
Mycolicibacterium chubuense	GCF_000266905.1	5	0	0	0	0	0	0	0	1	1	0	0	0	1	1	0	0	0	1	1
Mycolicibacterium thermoresistibile	GCF_900187065.1	7	0	0	0	0	0	0	0	1	0	0	0	0	1	1	0	0	0	0	1
Nocardioides sp.	GCF_030019515.1	1	0	0	0	0	1	0	0	1	1	0	0	2	0	1	0	1	0	1	2
Pandoraea cepalis	GCF_902459625.1	3	0	0	0	0	0	0	0	1	1	0	0	0	1	1	0	0	0	1	1
Pandoraea eparura	GCF_902459725.1	3	0	0	0	0	0	0	0	2	1	0	0	0	1	2	0	0	0	1	1
Pandoraea horticolens	GCF_902459555.1	4	0	1	0	0	0	2	2	1	1	0	0	0	1	1	4	0	1	1	1
Pandoraea iniqua	GCF_902459685.1	6	0	2	0	0	1	2	2	1	1	0	0	0	1	1	4	1	2	1	1
Pandoraea soli	GCF_902459595.1	4	0	0	0	0	0	0	0	1	1	0	0	0	1	1	0	0	0	1	1
Pandoraea sp. XJJ-1	GCF_026802345.1	3	0	0	0	0	0	0	0	1	1	0	0	0	1	1	0	0	0	1	1
Pandoraea terrae	GCF_902459695.1	4	0	0	0	0	0	0	0	1	1	0	0	0	1	1	0	0	0	1	1
Pandoraea terrigena	GCF_902459705.1	4	0	0	0	0	0	0	0	1	1	0	0	0	1	1	0	0	0	1	1
Paraburkholderia caffeinilytica	GCF_003368325.1	3	0	0	1	0	0	0	0	1	1	0	1	0	2	2	0	1	0	1	2
Paraburkholderia edwinii	GCF_019428685.1	3	0	0	1	0	2	1	1	1	1	0	1	0	2	2	2	3	0	1	2
Paraburkholderia kirstenboschensis	GCF_032806925.1	5	0	0	2	0	0	1	1	1	1	0	1	0	1	3	2	1	0	1	1
Paraburkholderia sp. 22B1P	GCF_037101255.1	9	0	0	2	0	0	1	1	1	1	0	1	0	2	3	2	1	0	1	2
Paraburkholderia sp. FT54	GCF_031585635.1	6	0	0	1	0	0	0	1	1	1	0	1	0	2	2	1	1	0	1	2
Paraburkholderia sp. IMGN_8	GCF_038050405.1	7	0	0	0	0	0	1	1	1	1	0	0	1	3	1	2	0	0	1	4
Paraburkholderia terrae	GCF_020885575.1	8	0	0	2	0	0	0	0	1	1	0	1	0	2	3	0	1	0	1	2
Paraburkholderia tropica	GCF_014171495.1	4	0	0	2	0	0	1	0	1	1	0	0	0	1	3	1	0	0	1	1
Paracoccus alcaliphilus	GCF_028553725.1	2	0	0	4	1	0	0	0	0	0	0	0	0	0	4	0	1	0	0	0
Paracoccus saliphilus	GCF_028553805.1	1	0	0	0	0	0	0	0	0	0	0	0	0	0	0	0	0	0	0	0
Prescottella equi	GCF_003013675.1	2	0	0	0	0	1	0	0	1	0	0	0	1	0	1	0	1	0	0	1
Providencia manganoxydans	GCF_016618195.1	3	1	0	0	1	0	2	2	1	2	0	0	1	2	1	5	1	0	2	3
Providencia rettgeri	GCF_003204135.1	3	1	1	0	1	1	0	1	1	2	0	0	1	0	1	2	2	1	2	1
Pseudolabrys taiwanensis	GCF_003367395.1	3	0	0	0	0	0	0	0	1	1	0	0	0	0	1	0	0	0	1	0
Pseudonocardia alaniniphila	GCF_022524485.1	4	0	0	0	0	1	0	0	1	0	0	0	1	1	1	0	1	0	0	2
Pseudonocardia aurantiaca	GCF_039526725.1	5	0	0	0	0	1	0	0	1	1	0	0	1	2	1	0	1	0	1	3
Pseudonocardia xinjiangensis	GCF_012911925.1	4	0	0	0	0	3	0	0	1	1	0	0	1	1	1	0	3	0	1	2
Pseudonocardia yunnanensis	GCF_039534065.1	4	0	0	0	0	1	0	0	1	0	0	0	1	1	1	0	1	0	0	2
Pseudonocardia zijingensis	GCF_039525585.1	8	0	0	0	1	0	0	0	1	1	0	0	2	2	1	0	1	0	1	4
Rhodopseudomonas sp. P2A-2r	GCF_026015985.1	4	0	0	1	1	0	0	0	1	1	0	0	0	0	2	0	1	0	1	0
Streptomyces aureus	GCF_039527835.1	5	0	0	0	0	2	0	0	2	0	0	0	5	1	2	0	2	0	0	6
Streptomyces beijiangensis	GCF_017315755.1	2	0	0	0	0	3	0	0	1	0	0	0	4	0	1	0	3	0	0	4
Streptomyces canus	GCF_036177905.1	5	0	0	0	0	4	1	1	1	0	0	0	3	2	1	2	4	0	0	5
Streptomyces dengpaensis	GCF_002946835.1	6	0	0	0	0	2	0	0	1	0	0	0	5	1	1	0	2	0	0	6
Streptomyces griseorubiginosus	GCF_003595235.1	3	0	0	0	0	3	1	1	1	0	0	0	4	1	1	2	3	0	0	5
Streptomyces lacrimifluminis	GCF_014646095.1	3	0	0	0	0	2	0	1	1	0	0	0	2	0	1	1	2	0	0	2
Streptomyces liangshanensis	GCF_011694815.1	2	0	0	0	1	3	0	0	1	0	0	0	4	2	1	0	4	0	0	6
Streptomyces pseudovenezuelae	GCF_036345035.1	3	0	0	0	0	3	1	1	1	0	0	0	3	1	1	2	3	0	0	4
Streptomyces scopuliridis	GCF_035917595.1	4	0	0	0	1	3	0	0	3	0	0	0	4	1	3	0	4	0	0	5
Streptomyces sp. A2-16	GCF_018128905.1	4	0	0	0	0	4	1	1	1	0	0	0	3	2	1	2	4	0	0	5
Streptomyces sp. DG1A-41	GCF_037055355.1	3	0	0	0	0	2	1	1	1	0	0	0	3	1	1	2	2	0	0	4
Streptomyces sp. f51	GCF_037940415.1	2	0	0	0	0	3	0	0	1	0	0	0	4	0	1	0	3	0	0	4
Streptomyces sp. NBC_00145	GCF_036010605.1	5	0	0	0	0	2	0	0	2	0	0	0	5	1	2	0	2	0	0	6
Streptomyces sp. NBC_00285	GCF_036174265.1	3	0	0	0	0	3	1	1	1	0	0	0	3	0	1	2	3	0	0	3
Streptomyces sp. NBC_00459	GCF_036013955.1	4	0	0	0	0	2	0	1	1	1	0	0	2	0	1	1	2	0	1	2
Streptomyces sp. NBC_00498	GCF_036013545.1	9	0	0	1	0	2	0	0	2	0	0	0	3	1	3	0	2	0	0	4
Streptomyces sp. NBC_00562	GCF_036345955.1	4	0	0	0	1	3	0	0	1	0	0	0	4	1	1	0	4	0	0	5
Streptomyces sp. NBC_00841	GCF_035917315.1	4	0	0	0	0	3	0	0	1	0	0	0	3	1	1	0	3	0	0	4
Streptomyces sp. NBC_01724	GCF_036244815.1	4	0	0	0	1	3	0	0	1	0	0	0	4	1	1	0	4	0	0	5
Streptomyces sp. NBC_01751	GCF_035918075.1	5	0	0	0	1	3	1	1	1	0	0	0	4	1	1	2	4	0	0	5
Streptomyces sp. NBC_01761	GCF_035917895.1	5	0	0	0	1	3	1	1	1	0	0	0	4	1	1	2	4	0	0	5
Streptomyces sp. NBC_01763	GCF_035917855.1	5	0	0	0	1	3	1	1	1	0	0	0	4	1	1	2	4	0	0	5
Streptomyces sp. Q6	GCF_036967205.1	3	0	0	0	0	2	0	0	2	0	0	0	3	1	2	0	2	0	0	4
Tardiphaga sp. 37S4	GCF_021044645.1	3	0	0	1	1	0	0	0	1	0	0	0	0	0	2	0	1	0	0	0
Variibacter gotjawalensis	GCF_002355335.1	3	0	0	1	0	0	1	1	1	0	0	1	0	0	2	2	1	0	0	0
Variovorax paradoxus	GCF_033807855.1	5	0	0	3	0	0	1	1	1	1	0	0	2	2	4	2	0	0	1	4
Variovorax sp. WDL1	GCF_901846895.1	11	0	0	0	0	2	0	0	1	1	0	0	0	2	1	0	2	0	1	2

## Sheet: Table S2
Table S2. Summary of bacterial genes coding for proteins involved in phosphorus mobilization and their source information.
Gene	Encoding proteins	Conserved domain	Pfam	KO/NCBI accession	Organism
gcd	quinoprotein glucose dehydrogenase	PQQ	PF01011	K00117	Escherichia coli
ppa	inorganic pyrophosphatase	Pyrophosphatase	PF00719	K01507	Mycobacterium tuberculosis
aphA	acid phosphatase (class B)	Acid_phosphat_B	PF03767	K03788	Escherichia coli
phoC	(GenBank) putative phosphoesterase, PA-phosphatase related	PAP2	PF01569	K09474	Klebsiella pneumoniae
phoN	acid phosphatase (class A)	PAP2	PF01569	K09474	Salmonella enterica
phnD	phosphonate transport system substrate-binding protein	Phosphonate-bd	PF12974	K02044	Mycolicibacterium smegmatis
phoA	alkaline phosphatase	Alk_phosphatase	PF00245	K01077	Escherichia coli
phoD	alkaline phosphatase D	PhoD	PF09423	K01113	Bacillus subtilis
		PhoD_N	PF16655
phox	Alkaline phosphatase	PhoX	PF05787	EFJ47998.1	Volvox carteri f. nagariensis
appA	4-phytase / acid phosphatase	His_phos_2	PF00328	K01093	Escherichia coli
phy	organic phosphoester hydrolysis，3-pyhtase	Phytase	PF02333	KAF5516010.1	Colletotrichum siamense
ppx	exopolyphosphatase	Ppx-GppA	PF02541	K01524	Escherichia coli
glpQ	glycerophosphoryl diester phosphodiesterase	GDPD	PF03009	K01126	Escherichia coli (eco: b2239)
ugpQ	glycerophosphoryl diester phosphodiesterase	GDPD	PF03009	K01126	Escherichia coli (eco: b3449)

## Sheet: Table S3
Metagenome sequencing data
								Taxonomic annotation							Taxa_Relative abundance
Sample ID	ORF	Total length(bp)	Average length(bp)	Total reads for mapping	Mapped reads	Contigs with reads mapped	Genes with reads mapped	Phylum	Class	Order	Family	Genus	Species	Unclassified	Bacteria	Archaea,Fungi,Viruses	Unclassfied
Blank1	1144634	557595763	487	92384526	31556096	1128527	1746045	22298	52467	36321	146749	282559	538694	166402	0.890119	0.017916	0.090757
Blank2	847303	420056114	495.8	66548836	26869870	1044768	1674256	20223	41518	26859	124347	262953	537730	140042	0.881025	0.019354	0.098162
Blank3	475502	213049678	448.1	62799858	12606726	1277025	1841528	27415	39707	52820	155742	225982	491173	131602	0.879996	0.027285	0.092655
MI1	624353	278334188	445.8	84955362	18319526	1672336	2334201	36757	54363	71926	195632	284049	632108	191696	0.884519	0.01811	0.096218
MI2	241145	102201016	423.8	65909962	10737591	1534098	2168129	31873	47086	61648	175657	260075	565180	152194	0.899161	0.00956	0.090055
MI3	654856	295459709	451.2	91478920	19308505	1702563	2373936	37584	55368	73131	198981	290297	646497	196065	0.886943	0.014618	0.097308
KP1	616265	273679485	444	78271906	21689432	3932976	5813407	79502	133787	119574	365047	643966	1316676	354402	0.892071	0.008128	0.099701
KP2	515470	230180568	446.5	70525062	18251657	3135828	4675487	64413	104387	98655	292861	515114	1053438	279712	0.892959	0.007631	0.09941
KP3	535631	245254909	456	75640462	21376758	4183531	6274055	75230	144970	106733	371242	693773	1403788	337862	0.898586	0.014593	0.086821
PY1	468826	207043048	442	68935278	16764913	2956059	4542702	45440	95349	64279	238640	581299	1034071	202639	0.912844	0.005206	0.08195
PY2	798546	359767295	451	78414928	27099077	4504984	6758035	86914	152672	125432	396871	745271	1521026	401924	0.902772	0.003191	0.094037
PY3	886270	395977709	447	89071102	28645161	4845343	7212829	87046	168230	118980	397519	841448	1655123	401866	0.908861	0.004322	0.086817
QV1	847263	392809146	464	79792304	26806599	3935887	5892319	70370	153984	95719	359519	650292	1342281	345762	0.90256	0.003279	0.094161
QV2	714892	333568545	467	87621248	26910721	4408067	6676636	74591	157799	101858	374776	816823	1535028	358283	0.913099	0.004607	0.082294
QV3	761482	348444694	458	89504398	28768593	5070500	7565230	91479	190916	126373	455632	853280	1745231	439653	0.906406	0.003649	0.089945
PA1	1081238	532023858	492	83941206	35022407	4572066	6912769	79556	161768	105832	379431	789525	1578537	396279	0.91037	0.003651	0.085979
PA2	1451546	748452260	516	93914816	55394762	3645052	5628218	69221	147501	86938	308242	604997	1274911	376422	0.883111	0.003406	0.113483
PA3	296477	119725883	404	76524492	11319090	2386015	3656606	38724	74503	62068	216685	453685	825037	149400	0.912858	0.01437	0.072772
QG1	632014	292336833	463	71113400	22591393	3809555	5693685	73068	132698	106901	357318	636628	1290716	316764	0.900116	0.00394	0.095944
QG2	601898	275219363	457	58566578	20673082	3504008	5347318	51772	99625	68948	251362	654223	1178626	243719	0.923915	0.004404	0.071681
QG3	389492	179120665	460	66029456	17329897	3443075	5250736	55688	107605	82389	275284	650647	1173673	249577	0.910438	0.004903	0.084659
Amplicon sequencing data-ITS
Sample ID	Input	Filtered	Denoised	Merged	Non-chimeric	Non-singleton	Domain	Phylum	Class	Order	Family	Genus	Species	Unclassified
Blank1	140105	132267	131154	127872	115796	115796	33	35	44	43	24	43	279	0
Blank2	134735	120208	119694	116825	112116	112116	16	7	10	14	13	37	167	0
Blank3	132155	104517	103036	96618	88717	88716	71	37	26	45	54	73	448	0
MI1	136988	113585	111885	107650	99394	99394	36	23	16	21	33	78	378	0
MI2	140473	129347	127577	122278	110944	110944	57	24	21	35	45	82	394	0
MI3	143537	128549	127196	122090	113615	113615	47	26	20	30	30	102	402	0
KP1	139624	115241	113669	107798	98302	98302	61	20	26	42	34	90	420	0
KP2	134541	110275	108600	102983	91655	91655	56	27	21	59	25	69	348	0
KP3	137990	117585	116114	111636	99762	99762	51	19	31	46	32	75	354	0
PY1	145670	116069	114696	108281	96144	96144	69	17	25	54	20	53	252	0
PY2	134381	107810	106224	100313	91617	91617	41	18	25	73	35	69	252	0
PY3	144246	111305	109854	103879	92228	92227	31	21	23	57	18	81	292	0
QV1	136886	117952	116723	111306	99812	99812	47	27	18	32	20	67	263	0
QV2	136347	119973	118680	112928	102239	102239	42	10	15	20	13	114	251	0
QV3	133670	109287	107647	101448	93523	93523	65	22	23	37	29	104	349	0
PA1	136170	89633	88489	82495	74479	74479	32	18	15	27	22	78	248	0
PA2	147168	115038	114145	110945	103834	103834	22	6	14	29	21	70	185	0
PA3	139088	118451	117116	113098	105118	105118	29	24	18	54	47	102	335	0
QG1	147085	123874	122131	114937	105426	105426	53	22	35	46	27	117	391	0
QG2	279066	158303	157167	148670	142404	142404	25	17	19	29	34	61	252	0
QG3	147848	133437	132102	125596	98349	98349	47	6	23	50	26	84	162	0
Amplicon sequencing data-16S rDNA
Sample ID	Input	Filtered	Denoised	Merged	Non-chimeric	Non-singleton	Domain	Phylum	Class	Order	Family	Genus	Species	Unclassified
Blank1	140767	133864	122532	73868	64360	63368	173	61	142	427	646	2917	261	0
Blank2	144858	138186	130366	93452	79959	79169	78	40	88	387	620	2427	323	0
Blank3	149124	141619	129583	79597	71473	69554	177	90	172	760	1080	3881	250	0
MI1	138137	129071	118192	69848	62612	60708	102	32	118	713	953	3580	365	0
MI2	147107	137693	125150	76446	69731	67649	130	61	164	627	1306	4289	464	0
MI3	147001	138045	125405	73571	65814	63362	133	60	167	818	1185	4194	436	0
KP1	130461	120673	110187	68551	61996	60635	72	32	90	707	850	3038	488	0
KP2	142069	132294	121347	76159	67526	65818	99	63	106	765	868	3561	501	0
KP3	143527	134537	122354	75672	68398	66945	81	38	113	740	1083	3254	522	0
PY1	134335	125012	115992	81116	74713	73718	38	28	90	385	894	2624	626	0
PY2	134421	125596	115606	72653	64319	62809	68	51	115	740	862	2902	433	0
PY3	130218	121722	113868	79218	72655	71962	36	30	87	496	742	2303	351	0
QV1	140129	130451	120414	75075	65695	64754	48	25	101	612	750	2398	376	0
QV2	137455	126914	118591	84597	77143	76320	38	30	82	355	865	2748	623	0
QV3	131907	122861	112977	73735	66731	65532	58	27	97	563	958	2936	450	0
PA1	138910	130051	120704	81676	69096	68093	57	39	125	318	951	2690	354	0
PA2	123752	115937	110535	85722	63834	63515	25	21	75	126	523	1202	142	0
PA3	130781	118308	107233	63117	57620	56244	104	60	119	362	1066	3463	309	0
QG1	135637	126183	115850	73581	64206	62825	87	45	84	644	879	2787	435	0
QG2	132495	123814	115086	77541	66749	65959	53	28	100	252	621	2536	346	0
QG3	139523	130293	120144	79009	70860	69750	67	38	99	426	951	3036	637	0

## Sheet: Table S4
OTUs at species level
s_12-FULL-67-14b sp001768615
s_12-FULL-67-14b sp016871275
s_13-2-20CM-66-19 sp001914695
s_13-2-20CM-66-19 sp018241505
s_13-2-20CM-66-19 sp019242385
s_2-02-FULL-62-17 sp001770355
s_2-12-FULL-66-21 sp001767455
s_3-1-20CM-2-70-9 sp005879975
s_3-1-20CM-2-70-9 sp005881885
s_3-1-20CM-2-70-9 sp005889075
s_40CM-4-65-16 sp005881275
s_40CM-4-65-16 sp005888075
s_40CM-4-68-19 sp005888115
s_40CM-68-15 sp003220615
s_62-47 sp001899255
s_Acidoferrum sp003224105
s_Acidoferrum sp018268785
s_Actinocorallia herbida
s_AP-15 sp005884825
s_AP-15 sp005888515
s_AP-15 sp019241915
s_AP-16 sp019243195
s_Aquincola tertiaricarbonis
s_AR31 sp003220495
s_AR31 sp003221615
s_AR31 sp003221635
s_AR37 sp016179165
s_AR8 sp003220195
s_AWTP1-13 sp011046675
s_AWTP1-13 sp017353825
s_AWTP1-13 sp902826255
s_Bog-515 sp003155135
s_BOG-934 sp003164305
s_BOG-934 sp009693865
s_Bradyrhizobium erythrophlei A
s_Bradyrhizobium erythrophlei C
s_Bradyrhizobium sp004799405
s_Bradyrhizobium sp016219575
s_Bradyrhizobium sp018130385
s_Bradyrhizobium sp019243075
s_Bradyrhizobium sp900103365
s_CADDYT01 sp902810755
s_CADDZO01 sp902812395
s_CADEFX01 sp902826715
s_CAIMXF01 sp013289985
s_CAIOYC01 sp903837135
s_Candidimonas nitroreducens
s_CF-13 sp005880875
s_CF-161 sp005880175
s_CF-163 sp005880075
s_CF-28 sp005881825
s_CF-39 sp005887995
s_DP-1 sp005879605
s_DP-20 sp005879255
s_DP-20 sp009692615
s_DP-20 sp011329495
s_DSOT01 sp001770325
s_DSOT01 sp016202605
s_DSSY01 sp011330955
s_Entotheonella factor
s_Entotheonella palauensis
s_Gaiella sp009694305
s_Gp6-AA40 sp013140775
s_Hydrogenophaga sp004795855
s_JACQUR01 sp016210245
s_JACQWC01 sp016209635
s_JACVRW01 sp014534235
s_JADMIL01 sp014896235
s_JAFAZJ01 sp016869975
s_Kribbella albertanoniae
s_Lentzea indica
s_Massilia arenosa
s_Mycobacterium sp003719305
s_Nocardioides guangzhouensis
s_Nocardioides thalensis
s_Noviherbaspirillum malthae
s_NP-7 sp005882445
s_NP-7 sp005883865
s_P52-10 sp014873415
s_PALSA-1004 sp003153455
s_PALSA-1004 sp016202615
s_Palsa-187 sp903892565
s_PALSA-243 sp003135055
s_Palsa-465 sp019241635
s_Palsa-504 sp003140115
s_PALSA-612 sp003134505
s_PALSA-894 sp003140315
s_PALSA-894 sp005884685
s_Polaromonas sp002379085
s_Pseudolabrys sp003152455
s_Pseudorivibacter rhizosphaerae
s_QHBS01 sp003243885
s_QHWT01 sp003222675
s_QHWT01 sp013362195
s_QIAA01 sp003224905
s_QYPT01 sp903928745
s_Reyranella sp003153415
s_Reyranella sp009377525
s_Reyranella sp013290035
s_Reyranella sp017305915
s_Reyranella sp017308235
s_Reyranella sp018240695
s_Reyranella sp018240745
s_Reyranella sp902825855
s_SCGC-AG-212-J23 sp004297625
s_SCGC-AG-212-J23 sp005888925
s_Schlegelella A sp017881025
s_SG8-41 sp016192825
s_SHVP01 sp016869765
s_Solirubrobacter sp000425945
s_Sphingomonas G solaris
s_Streptomyces sp018070025
s_SXND01 sp005777235
s_SYOC01 sp005804965
s_Trinickia sp013282575
s_UBA11361 sp005881295
s_UBA11361 sp005881495
s_UBA2160 sp002328865
s_UBA4736 sp002404015
s_Unclassified_c_Actinomycetia
s_Unclassified_c_Alphaproteobacteria
s_Unclassified_c_Dormibacteria
s_Unclassified_c_Thermoleophilia
s_Unclassified_d_Bacteria
s_Unclassified_f_70-9
s_Unclassified_f_Acetobacteraceae
s_Unclassified_f_Binataceae
s_Unclassified_f_Burkholderiaceae
s_Unclassified_f_Casimicrobiaceae
s_Unclassified_f_CSP1-6
s_Unclassified_f_Dormibacteraceae
s_Unclassified_f_Gaiellaceae
s_Unclassified_f_Hyphomicrobiaceae
s_Unclassified_f_Ilumatobacteraceae
s_Unclassified_f_Ktedonobacteraceae
s_Unclassified_f_Micrococcaceae
s_Unclassified_f_SG8-39
s_Unclassified_f_SG8-41
s_Unclassified_f_UBA2999
s_Unclassified_f_UBA9968
s_Unclassified_f_Usitatibacteraceae
s_Unclassified_f_Vicinamibacteraceae
s_Unclassified_f_Xanthobacteraceae
s_Unclassified_g_12-FULL-67-14b
s_Unclassified_g_3-1-20CM-2-70-9
s_Unclassified_g_40CM-4-65-16
s_Unclassified_g_40CM-4-68-19
s_Unclassified_g_Acidoferrum
s_Unclassified_g_AP-15
s_Unclassified_g_AR31
s_Unclassified_g_AR37
s_Unclassified_g_AWTP1-13
s_Unclassified_g_Bradyrhizobium
s_Unclassified_g_CADEFD01
s_Unclassified_g_CAIMXF01
s_Unclassified_g_CAIUKV01
s_Unclassified_g_CF-72
s_Unclassified_g_Dormibacter
s_Unclassified_g_DP-20
s_Unclassified_g_Entotheonella
s_Unclassified_g_Frankia
s_Unclassified_g_Ga0077555
s_Unclassified_g_Gp6-AA40
s_Unclassified_g_HR10
s_Unclassified_g_Nocardioides
s_Unclassified_g_Noviherbaspirillum
s_Unclassified_g_NP-7
s_Unclassified_g_Piscinibacter
s_Unclassified_g_Pseudonocardia
s_Unclassified_g_Ramlibacter
s_Unclassified_g_Reyranella
s_Unclassified_g_SIAQ01
s_Unclassified_g_Solirubrobacter
s_Unclassified_g_Streptomyces
s_Unclassified_g_UBA12499
s_Unclassified_g_UBA6544
s_Unclassified_g_Variovorax
s_Unclassified_g_VBDM01
s_Unclassified_g_WYBJ01
s_Unclassified_o_Acidimicrobiales
s_Unclassified_o_Burkholderiales
s_Unclassified_o_IMCC26256
s_Unclassified_o_Mycobacteriales
s_Unclassified_o_UBA5794
s_Unclassified_o_Vicinamibacterales
s_Unclassified_p_Actinobacteriota
s_Unclassified_p_Chloroflexota
s_Unclassified_p_Proteobacteria
s_Variovorax sp004217005
s_VBCG01 sp015075645
s_VBDM01 sp005882235
s_VFJJ01 sp009886115
s_VGLJ01 sp016866775
s_WHTF01 sp009379725
s_WYBJ01 sp009377585
s_Z2-YC6860 sp016869215
s_ZC4RG20 sp017577365
s_2-02-FULL-65-29 sp001767435
s_2-02-FULL-66-22 sp011054645
s_2-12-FULL-64-23 sp017880745
s_70-18 sp001899585
s_Acidovorax eiseniae
s_Actinoallomurus bryophytorum
s_Actinophytocola algeriensis
s_Actinophytocola oryzae
s_Albitalea sp005882155
s_Amycolatopsis sp016889705
s_Amycolatopsis sulphurea
s_AP-15 sp017353855
s_AP-15 sp019238055
s_AP-15 sp019240125
s_AP-15 sp019244535
s_Aquihabitans sp019048865
s_AR31 sp003221595
s_AR37 sp003220345
s_AR5 sp003220265
s_Asanoa ishikariensis
s_AWTP1-13 sp008933705
s_Bog-1198 sp003132425
s_Bog-473 sp003160635
s_Bog-473 sp003169235
s_Bog-756 sp003164275
s_Bosea caraganae
s_Bosea sp004341515
s_Bosea sp900466745
s_Bradyrhizobium canariense A
s_Bradyrhizobium erythrophlei B
s_Bradyrhizobium lablabi B
s_Bradyrhizobium lablabi C
s_Bradyrhizobium paxllaeri
s_Bradyrhizobium sp000473045
s_Bradyrhizobium sp009766005
s_Bradyrhizobium sp017872735
s_Bradyrhizobium sp018971675
s_Bradyrhizobium sp019242285
s_Bradyrhizobium tropiciagri
s_CADCWF01 sp902806345
s_CADEDH01 sp902826025
s_CADEEN01 sp902826345
s_CADEFD01 sp902826065
s_CAIRTN01 sp903881515
s_CAIUKV01 sp016870245
s_CAIYPG01 sp903928055
s_CAIYRG01 sp009693985
s_CF-72 sp019247515
s_Chersky-822 sp017882645
s_Compostimonas suwonensis
s_Cryptosporangium aurantiacum
s_Desertimonas flava
s_Dongia sp000620685
s_DP-20 sp005879435
s_DP-20 sp016874755
s_DSOI01 sp011054605
s_Edaphobacter aggregans
s_Edaphobacter sp009765825
s_FEN-1219 sp003155415
s_Fen-181 sp003170135
s_Frankia canadensis
s_Ga0077545 sp014191545
s_Ga0077555 sp001464755
s_GCA-2689605 sp002689605
s_GJ-E10 sp900290335
s_Gp6-AA40 sp003222635
s_Gp6-AA45 sp001917905
s_Gp6-AA45 sp003223775
s_Hydrogenophaga palleronii
s_Hylemonella sp001797315
s_Hypericibacter adhaerens
s_Iso899 sp000421445
s_JABFSC01 sp013140885
s_JABSQW01 sp013215605
s_JACCYJ01 sp013696555
s_JACDBD01 sp013695115
s_JACPFE01 sp016183145
s_JACPOP01 sp016191465
s_JACPRU01 sp016189835
s_JACPZP01 sp016195405
s_JACQAI01 sp016195115
s_JACQAP01 sp016194905
s_JACQEC01 sp016200765
s_JACQFL01 sp016200085
s_JACQHI01 sp016199105
s_JACRBR01 sp016213125
s_JACVRW01 sp016929195
s_JAENWD01 sp016650245
s_JAFARZ01 sp019245115
s_JAFAXD01 sp019241285
s_JAFKFI01 sp017307285
s_Kalu-18 sp016700055
s_KK5 sp001984095
s_Kribbella pittospori
s_Kribbella solani
s_Kribbella soli A
s_Kribbella sp004345365
s_Kribbella sp004345665
s_Leucobacter sp910593785
s_LMDS01 sp001263235
s_Luteibacter sp015905245
s_Micromonospora E sp003751085
s_Micromonospora globispora
s_Microvirga massiliensis
s_Mumia xiangluensis
s_Mycobacterium sp014202335
s_Nocardia colli
s_Nocardioides sp013155335
s_Nocardioides ungokensis
s_Novosphingobium sp019075875
s_Novosphingobium sp019090585
s_Novosphingobium sp900113255
s_ORNL1 sp012971745
s_P52-10 sp000516555
s_PALSA-1004 sp903905655
s_Palsa-465 sp019239445
s_PALSA-610 sp003134555
s_PALSA-693 sp003156595
s_Palsa-883 sp003151425
s_PALSA-911 sp003133265
s_Paraburkholderia solisilvae
s_Paraburkholderia sp013177735
s_Paucibacter A sp903820745
s_Phenylobacterium sp003136395
s_Phenylobacterium sp004299445
s_Phenylobacterium sp004799395
s_Phenylobacterium sp016793225
s_Phyllobacterium sp017833775
s_Plantactinospora sp002846275
s_Pseudomonas E putida G
s_Pseudonocardia dioxanivorans
s_Pseudorhodoplanes sinuspersici
s_REEB85 sp018971455
s_Reyranella soli
s_Reyranella sp005884705
s_Reyranella sp016185145
s_Reyranella sp016467395
s_Reyranella sp016780605
s_Reyranella sp016870055
s_Reyranella sp018242505
s_Reyranella sp900110395
s_Rhizobium sp004362445
s_Rhizobium sp014193025
s_Rhizobium tropici B
s_Rhizorhabdus sp004297635
s_Rhodoferax A sediminis
s_Rhodoligotrophos appendicifer
s_Rhodopila sp009765975
s_Roseiarcus sp019237205
s_R-RK-3 sp002198715
s_Rubrivivax sp016790435
s_SCN-70-22 sp014379705
s_SCSIO-52909 sp902812425
s_SCTM01 sp004297485
s_SHWF01 sp009693935
s_Silvibacterium sp019232935
s_Solirubrobacter soli
s_Sphingobium herbicidovorans
s_Sphingobium sp006226685
s_Sphingobium sp013375555
s_Sphingomonas sp014489075
s_Streptomyces sp900116325
s_SYOC01 sp016197285
s_SYSU-D60007 sp008039615
s_SYSU-D60009 sp003574735
s_SYSU-D60015 sp003576705
s_Thioclava sp002563775
s_Thiomonas sp000377645
s_Trebonia kvetii
s_U87765 sp018131225
s_UBA11650 sp002710215
s_UBA5216 sp002412495
s_UBA6159 sp002422345
s_Unclassified_c_Acidimicrobiia
s_Unclassified_c_Binatia
s_Unclassified_c_Dehalococcoidia
s_Unclassified_c_Gammaproteobacteria
s_Unclassified_f_Bin18
s_Unclassified_f_CAIXPF01
s_Unclassified_f_CSP1-4
s_Unclassified_f_Fen-336
s_Unclassified_f_Mycobacteriaceae
s_Unclassified_f_PALSA-555
s_Unclassified_f_Pseudonocardiaceae
s_Unclassified_f_Reyranellaceae
s_Unclassified_f_Sphingomonadaceae
s_Unclassified_f_Steroidobacteraceae
s_Unclassified_f_Streptosporangiaceae
s_Unclassified_f_Thermoleophilaceae
s_Unclassified_f_UBA4427
s_Unclassified_g_20CM-2-55-15
s_Unclassified_g_28-YEA-48
s_Unclassified_g_69-11
s_Unclassified_g_Afipia
s_Unclassified_g_AR5
s_Unclassified_g_Asanoa
s_Unclassified_g_Azohydromonas
s_Unclassified_g_Belnapia
s_Unclassified_g_Bosea
s_Unclassified_g_Burkholderia
s_Unclassified_g_CAIXEA01
s_Unclassified_g_CAIXZV01
s_Unclassified_g_DP-3
s_Unclassified_g_DSOT01
s_Unclassified_g_F1-20-MAGs160
s_Unclassified_g_GAS188
s_Unclassified_g_GCA-002728675
s_Unclassified_g_Inquilinus
s_Unclassified_g_JAAXHF01
s_Unclassified_g_JABFSC01
s_Unclassified_g_JACDCA01
s_Unclassified_g_Kribbella
s_Unclassified_g_Mycobacterium
s_Unclassified_g_Nocardia
s_Unclassified_g_Novosphingobium
s_Unclassified_g_Oceanibaculum
s_Unclassified_g_P52-10
s_Unclassified_g_Palsa-465
s_Unclassified_g_Palsa-881
s_Unclassified_g_Paraburkholderia
s_Unclassified_g_PBB1
s_Unclassified_g_Phenylobacterium
s_Unclassified_g_PR03
s_Unclassified_g_R-H-3
s_Unclassified_g_Rhizobium
s_Unclassified_g_Rhizorhabdus
s_Unclassified_g_Rhodopila
s_Unclassified_g_RPQJ01
s_Unclassified_g_SCN-70-22
s_Unclassified_g_Sphingomicrobium
s_Unclassified_g_Sphingomonas
s_Unclassified_g_SYFT01
s_Unclassified_g_Trebonia
s_Unclassified_g_VAYN01
s_Unclassified_g_VBCG01
s_Unclassified_g_Virgisporangium
s_Unclassified_g_WHSN01
s_Unclassified_g_WLJO01
s_Unclassified_g_WTFX01
s_Unclassified_o_HRBIN30
s_Unclassified_o_Propionibacteriales
s_Unclassified_o_Rhizobiales
s_Unclassified_o_Solirubrobacterales
s_Vannielia sp017792405
s_Variovorax gossypii
s_Variovorax paradoxus C
s_Variovorax sp000282635
s_Variovorax sp016405905
s_Variovorax sp019207085
s_VAYN01 sp017882505
s_VAZQ01 sp005883115
s_VAZQ01 sp019237215
s_VBCG01 sp018241745
s_VBCG01 sp018241785
s_VFZN01 sp016871195
s_VGNK01 sp016866055
s_VGPF01 sp016875535
s_VGTJ01 sp016874775
s_WGMQ01 sp016125005
s_WHSN01 sp009380045
s_WHSN01 sp018268955
s_WHST01 sp009379955
s_WHTJ01 sp009377795
s_WHTK01 sp011330885
s_WHTX01 sp009377505
s_WLJO01 sp009701715
s_WLRQ01 sp009697815
s_Z2-YC6860 sp017304505

## Sheet: Table S5
NO	Identification	Colonies	Phylum	Genera	C use Type
OA77	Streptomyces sp. 3446	44	Actinobacteria	Streptomyces	Generalist
OA57	Streptomyces sp.	24	Actinobacteria	Streptomyces	ND
OA58	Variovorax sp.	9	Proteobacteria	Variovorax	ND
OA69	Streptomyces sp. N50	8	Actinobacteria	Streptomyces	Specialist
OA64	Cupriavidus campinensis	6	proteobacteria	Cupriavidus	ND
OA26	Flavobacterium johnsoniae UW101	6	Bacteroidota	Flavobacterium	ND
OA17	Cupriavidus pinatubonensis	5	Proteobacteria	Cupriavidus	Generalist
OA53	Cupriavidus sp.	5	Proteobacteria	Cupriavidus	ND
OA35	Streptomyces sp. E4R7_pA	5	Actinobacteria	Streptomyces	ND
OA19	Paraburkholderia caribensis	4	Proteobacteria	Paraburkholderia	Generalist
OA43	Rhizobium sp.	4	Proteobacteria	Rhizobium	ND
OA39	Xanthobacter sp.	4	Proteobacteria	Xanthobacter	ND
OA7	Agrobacterium radiobacter	3	Proteobacteria	Agrobacterium	Generalist
OA27	Burkholderia sp. HBU54006(751-1)	3	Proteobacteria	Burkholderia	Specialist
OA60	Cupriavidus sp. NBRC 102509	3	Proteobacteria	Cupriavidus	ND
OA76	Streptomyces canus	3	Actinobacteria	Streptomyces	ND
OA47	Streptomyces pseudovenezuelae	3	Actinobacteria	Streptomyces	ND
OA40	Variovorax soli	3	Proteobacteria	Variovorax	ND
OA10	Agrobacterium tumefaciens	2	Proteobacteria	Agrobacterium	Generalist
OA3	Agrobacterium sp.	2	Proteobacteria	Agrobacterium	Generalist
OA59	Burkholderia sp.	2	Proteobacteria	Burkholderia	Generalist
OA25	Cupriavidus paucu	2	Proteobacteria	Cupriavidus	ND
OA9	Dyadobacter pollutisoli	2	Bacteroidota	Dyadobacter	ND
OA66	Luteibacter aegosomaticola	2	Proteobacteria	Luteibacter	ND
OA5	Novosphingobium guangzhouense	2	Proteobacteria	Novosphingobium	Generalist
OA38	Pseudomonas brassicacearum	2	Proteobacteria	Pseudomonas	Generalist
OA67	Pseudomonas sp.	2	Proteobacteria	Pseudomonas	Generalist
OA62	Sphingobium yanoikuyae	2	Proteobacteria	Sphingobium	Generalist
OA44	Sphingobium sp.	2	Proteobacteria	Sphingobium	ND
OA74	Sphingomonas sp. MN35	2	Proteobacteria	Sphingomonas	ND
OA50	Streptomyces umbrinus	2	Actinobacteria	Streptomyces	ND
OA70	Variovorax sp. A2	2	Proteobacteria	Variovorax	ND
OA8	Agrobacterium sp. VKS-2014a	1	Proteobacteria	Agrobacterium	Generalist
OA11	Aminobacter niigataensis	1	Proteobacteria	Aminobacter	ND
OA51	Ancylobacter rudongensis	1	Proteobacteria	Ancylobacter	Specialist
OA12	Ancylobacter novellus	1	Proteobacteria	Ancylobacter	ND
OA32	Azorhizobium oxalatiphilum	1	Proteobacteria	Azorhizobium	Generalist
OA13	Azorhizobium oxa	1	Proteobacteria	Azorhizobium	ND
OA14	Bacillus sp. FJAT-27812	1	Firmicutes	Bacillus	Generalist
OA15	Bacillus sp. NO16	1	Firmicutes	Bacillus	ND
OA18	Burkholderia sp. KN-8	1	Proteobacteria	Burkholderia	ND
OA20	Caulobacter vibrioides	1	Proteobacteria	Caulobacter	ND
OA21	Chitinophaga silvisoli	1	CFB group	Chitinophaga	ND
OA23	Cupriavidus sp. UR 7-04	1	Proteobacteria	Cupriavidus	Specialist
OA24	Cupriavidus sp. M332	1	Proteobacteria	Cupriavidus	Specialist
OA52	Cupriavidus sp. 4HB-6	1	Proteobacteria	Cupriavidus	Generalist
OA22	Cupriavidus numazuensis	1	Proteobacteria	Cupriavidus	ND
OA31	Cupriavidus pauculus	1	Proteobacteria	Cupriavidus	ND
OA54	Cupriavidus sp. JP	1	Proteobacteria	Cupriavidus	ND
OA30	Devosia riboflavina	1	Proteobacteria	Devosia	ND
OA61	Dyadobacter sp. U1	1	Bacteroidota	Dyadobacter	ND
OA33	Mycobacterium sp. K128W	1	Actinomycetota	Mycobacterium	ND
OA16	Niallia nealsonii	1	Bacillati	Niallia	Generalist
OA71	Novosphingobium resinovor	1	Proteobacteria	Novosphingobium	ND
OA73	Novosphingobium sp.	1	Proteobacteria	Novosphingobium	ND
OA6	Paenibacillus sp. HA8	1	Bacillati	Paenibacillus	Generalist
OA41	Paenibacillus taichungensis	1	Bacillati	Paenibacillus	ND
OA56	Paraburkholderia sp.	1	Proteobacteria	Paraburkholderia	Generalist
OA42	Paraburkholderia edwinii	1	Proteobacteria	Paraburkholderia	ND
OA72	Pseudomonas sp. 3-14	1	Proteobacteria	Pseudomonas	ND
OA28	Ralstonia sp. 80	1	Proteobacteria	Ralstonia	ND
OA4	Rhizobium grahamii	1	Proteobacteria	Rhizobium	ND
OA75	Rhizobiaceae bacterium CC15Q2	1	Proteobacteria	Rhizobium	ND
OA45	Sphingobium sp. CR 2-3	1	Proteobacteria	Sphingobium	ND
OA55	Sphingomonas leidyi	1	Proteobacteria	Sphingomonas	ND
OA46	Sphingomonas sp.	1	Proteobacteria	Sphingomonas	ND
OA63	Sphingomonas sp. MY-CA111	1	Proteobacteria	Sphingomonas	Generalist
OA1	Streptomyces prunicolor NBRC 13075	1	Actinobacteria	Streptomyces	ND
OA2	Streptomyces chrysomallus subsp. fumigatus	1	Actinobacteria	Streptomyces	ND
OA29	Streptomyces aquilus	1	Actinobacteria	Streptomyces	ND
OA49	Streptomyces plumbiresistens	1	Actinobacteria	Streptomyces	ND
OA34	Streptomyces sp. E4R10_pA	1	Actinobacteria	Streptomyces	ND
OA36	Streptomyces sp. NBC_01478	1	Actinobacteria	Streptomyces	ND
OA37	Streptomyces sp. NBC_01518	1	Actinobacteria	Streptomyces	ND
OA48	Streptomyces xanthophaeus	1	Actinobacteria	Streptomyces	ND
OA65	Variovorax sp. RKNM96	1	Proteobacteria	Variovorax	ND
OA68	Variovorax paradoxus	1	Proteobacteria	Variovorax	Generalist
OA78	Variovorax beijing	1	Proteobacteria	Variovorax	ND
OA79	Variovorax ginsengisoli	1	Proteobacteria	Variovorax	ND
